# Supplementary material for: A broad scope of aliphatic polyesters prepared by elimination of small molecules from sustainable 1,3-dioxolan-4-ones
Source: Royal Society of Chemistry journal article supplement (doi:10.1039/c7py00254h), 2017-01-01
Supplement: c7py00254h1.pdf [file c7py00254h1.pdf]

## Supporting Information for

A broad scope of aliphatic polyesters prepared by elimination of small molecules from sustainable 1,3-dioxolan-4-ones

Stefan A. Cairns, Amélie Schultheiss, Michael P. Shaver\*

\* EaStCHEM, School of Chemistry, University of Edinburgh, Joseph Black Building, David Brewster Road, EH9 3FJ, Edinburgh, UK. E-mail: michael.shaver@ed.ac.uk; Tel: +44 (0)131 650 47

## Contents

|                                                                |    |
|----------------------------------------------------------------|----|
| Materials .....                                                | 2  |
| General considerations .....                                   | 2  |
| Monomer syntheses.....                                         | 3  |
| Representative Polymerizations.....                            | 4  |
| S1: Toxicity of Phosgene Gases and Paraformaldehyde.....       | 5  |
| S2: Monomer pricing (1 kg) .....                               | 5  |
| S3: Degradation of poly(mandelic acid) with proteinase K ..... | 5  |
| S4: Recycling recovered paraformaldehyde.....                  | 6  |
| DOX copolymerizations data .....                               | 6  |
| Substituted RDOX homopolymerizations.....                      | 7  |
| Figures .....                                                  | 9  |
| References.....                                                | 17 |

## Materials

Commercial reagents were purchased from Acros Organics, Alfa Aesar, Fisher, VWR or Sigma Aldrich and used as received unless otherwise stated. Rac-lactide and L-lactide were provided by Corbion and were purified by three vacuum sublimations prior to polymerizations. Benzyl alcohol,  $\beta$ -butyrolactone,  $\epsilon$ -caprolactone,  $d_5$ -pyridine, and  $d$ -chloroform were purified by stirring over  $\text{CaH}_2$  followed by distillation under an inert atmosphere.  $d_6$ -Benzene and  $d_8$ -toluene were dried over Na/benzophenone and subsequently distilled under an inert atmosphere. Toluene, dichloromethane, THF, hexanes and diethyl ether were dried using an Innovative Technologies purification system consisting of alumina and copper catalyst. The solvents were degassed by three freeze-pump-thaw cycles prior to use.  $\text{MeAl}(\text{salen})^{\text{tbu,tbu,pr}}$  was synthesised by following established protocols.

## General considerations

General methods: All air-sensitive manipulations were performed in an MBraun LABmaster sp glovebox equipped with a  $-35^\circ\text{C}$  freezer (with  $[\text{O}_2]$  and  $[\text{H}_2\text{O}]$  at 0.1ppm according to built-in analysers) or on a dual manifold Schlenk line using standard Schlenk techniques.

Characterization: All  $^1\text{H}$ ,  $^{13}\text{C}$  NMR spectra were obtained on Bruker Avance III 400 and 500 MHz spectrometers or on a Bruker Avance I 600 MHz spectrometer. All spectra were obtained at ambient temperature. The chemical shifts ( $\delta$ ) and coupling constants (J) were recorded in parts per million (ppm) and Hertz (Hz). Gel permeation chromatography (GPC) was carried out in THF at a flow rate of  $1 \text{ mL min}^{-1}$  at  $35^\circ\text{C}$  on a Malvern Instruments Viscotek 270 GPC Max triple detection system with 2 mixed-bed styrene/DVB columns ( $300 \times 7.5 \text{ mm}$ ). PLA, PHB and PCL dn/dc values used were 0.050,<sup>1</sup> 0.065,<sup>2</sup> and  $0.072 \text{ ml/g}$ .<sup>3</sup> The dn/dc value of PMA was experimentally determined to be 0.11. For other polymers molecular weights were left uncorrected versus polystyrene standards. Mass spectrometry was performed on a Bruker UltraflexExtreme MALDI-TOF spectrometer. MALDI-TOF samples were prepared using the following matrices; 2,5-dihydroxybenzoic acid for poly(lactic acid) and poly(hexahydromandelic acid), dithranol for poly(mandelic acid) and sodium or potassium trifluoroacetic acid was used as the ionization source. Differential scanning calorimetry (DSC) was carried out using a DSC 404 F3 Pegasus<sup>®</sup> DSC instrument using a heat ( $25\text{-}200^\circ\text{C}$ ) / cool ( $200\text{-}25^\circ\text{C}$ ) / heat ( $25\text{-}500^\circ\text{C}$ ) cycle at a rate of  $10^\circ\text{C min}^{-1}$ . Values of  $T_g$  and  $T_m$  were obtained from the second heating scan.

## Monomer syntheses

Two general monomer synthesis procedures followed below:

### Procedure 1.

The parent  $\alpha$ -hydroxy acid (7.53mmol), paraformaldehyde (0.36g, 12mmol) and p-toluenesulfonic acid monohydrate (0.13g, 0.75mmol) were dissolved in benzene (50mL) and refluxed at 110 °C in a Deans-Stark apparatus to periodically remove water over 6h. The reaction mixture was cooled and washed with sodium bicarbonate aq. (10%), water and sodium chloride aq. (sat.). The organic layer was dried with magnesium sulphate and the solvent was removed from the organic layer in vacuo. The crude product was stirred over calcium hydride for 16h before being purified by vacuum distillation.

1,3-Dioxolan-4-one (DOX): Colourless oil, 26% yield.  $^1\text{H}$  NMR (500MHz,  $\text{CDCl}_3$ )  $\delta$  5.50 (s, 2H,  $\text{OCH}_2\text{O}$ ), 4.20 (s, 2H,  $\text{CCH}_2\text{O}$ ) ppm.  $^{13}\text{C}$  NMR (126 MHz,  $\text{CDCl}_3$ )  $\delta$  171.20, 96.10, 62.45ppm.

5-Methyl-1,3-dioxolan-4-one (MeDOX): Colourless oil, 75% yield.  $^1\text{H}$  NMR (500 MHz, Chloroform-*d*)  $\delta$  5.50 (s, 1H,  $\text{OCH}_2\text{O}$ ), 5.38 (s, 1H,  $\text{OCH}_2\text{O}$ ), 4.27 (q,  $J = 6.8$  Hz, 1H,  $\text{OCCHO}$ ), 1.47 (d,  $J = 6.8$  Hz, 3H,  $\text{CCH}_3$ ).  $^{13}\text{C}$  NMR (151 MHz,  $\text{CDCl}_3$ )  $\delta$  121.97, 42.36, 42.34, 18.32, -35.26.

5-Phenyl-1,3-dioxolan-4-one (PhDOX): Colourless oil, 96% yield.  $^1\text{H}$  NMR (500 MHz, Chloroform-*d*)  $\delta$  7.52 – 7.37 (m, 5H, Ar), 5.67 (s, 1H,  $\text{OCH}_2\text{O}$ ), 5.58 (s, 1H,  $\text{OCH}_2\text{O}$ ), 5.23 (s, 1H,  $\text{CCCHO}$ ) ppm.  $^{13}\text{C}$  NMR (126 MHz, Chloroform-*d*)  $\delta$  171.38, 133.30, 129.24, 128.90, 126.52, 94.57, 74.49 ppm.

5-Isopropyl-1,3-dioxolan-4-one (iPrDOX): Colourless oil, 90% yield.  $^1\text{H}$  NMR (500 MHz, Chloroform-*d*)  $\delta$  5.51 (s, 1H,  $\text{OCH}_2\text{O}$ ), 5.42 (d,  $J = 0.9$  Hz, 1H,  $\text{OCH}_2\text{O}$ ), 4.04 (dt,  $J = 4.4, 0.7$  Hz, 1H,  $\text{OCCHO}$ ), 2.18 (heptd,  $J = 6.8, 4.2$  Hz, 1H), 1.09 (d,  $J = 6.9$  Hz, 3H), 1.01 (d,  $J = 6.9$  Hz, 3H).  $^{13}\text{C}$  NMR (126 MHz,  $\text{CDCl}_3$ )  $\delta$  172.35, 94.48, 29.88, 18.26, 16.65.

5-Cyclohexyl-1,3-dioxolan-4-one (CyDOX): Colourless oil, 86% yield.  $^1\text{H}$  NMR (500 MHz, Chloroform-*d*)  $\delta$  5.50 (s, 1H,  $\text{OCH}_2\text{O}$ ), 5.42 (s, 1H,  $\text{OCH}_2\text{O}$ ), 4.03 (d,  $J = 4.0$  Hz, 1H,  $\text{OCCHO}$ ), 1.91 – 1.73 (m, 3H), 1.72 – 1.58 (m, 2H), 1.34 – 1.09 (m, 6H).  $^{13}\text{C}$  NMR (126 MHz,  $\text{CDCl}_3$ )  $\delta$  172.59, 94.74, 39.43, 28.93, 26.92, 26.08, 26.02, 25.87.

5-nButyl-1,3-dioxolan-4-one (nBuDOX): Colourless oil, 60% yield.  $^1\text{H}$  NMR (500 MHz, Chloroform-*d*)  $\delta$  5.48 (s, 1H,  $\text{OCH}_2\text{O}$ ), 5.38 (s, 1H,  $\text{OCH}_2\text{O}$ ), 4.16 (m, 1H,  $\text{OCCHO}$ ), 1.85 (m, 1H,  $\text{CH}_2\text{CH}_2\text{CH}_2\text{CH}_3$ ), 1.77 – 1.65 (m, 1H,  $\text{CH}_2\text{CH}_2\text{CH}_2\text{CH}_3$ ), 1.52 – 1.27 (m, 4H,

$\text{CH}_2\text{CH}_2\text{CH}_3$ ), 0.89 (t,  $J = 7.2$  Hz, 3H,  $\text{CH}_3$ ).  $^{13}\text{C}$  NMR (126 MHz,  $\text{CDCl}_3$ )  $\delta$  172.98, 94.03, 73.02, 29.92, 26.88, 22.12, 13.66.

5-iButyl-1,3-dioxolan-4-one (iBuDOX): Colourless oil, 60%.  $^1\text{H}$  NMR (500 MHz, Chloroform-*d*)  $\delta$  5.50 (s, 1H), 5.39 (s, 1H), 4.20 (ddd,  $J = 9.3, 3.9, 0.9$  Hz, 1H,  $\text{OCCHO}$ ), 1.87 (dh,  $J = 8.1, 6.6$  Hz, 1H,  $\text{CH}_2\text{CH}(\text{CH}_3)$ ), 1.75 – 1.59 (m, 2H,  $\text{CH}_2\text{CH}(\text{CH}_3)$ ), 0.96 (dd,  $J = 6.8, 5.5$  Hz, 6H,  $\text{CH}_3$ ).  $^{13}\text{C}$  NMR (126 MHz,  $\text{CDCl}_3$ )  $\delta$  173.43, 93.93, 77.25, 77.00, 76.75, 71.83, 38.95, 25.03, 22.79, 21.63.

## Procedure 2.

The parent  $\alpha$ -hydroxy acid (7.53mmol), and *p*-toluenesulfonic acid (0.13g, 0.75mmol) were dissolved in a mixture of acetone and benzene (1:1) (50mL) and refluxed in a Deans-Stark apparatus, periodically removing water formed over 6h. The reaction mixture was cooled and washed with sodium bicarbonate aq. (10%), water and sodium chloride aq. (sat.). The organic layer was dried with magnesium sulphate and the solvent was removed from the organic layer *in vacuo*. The crude product was then stirred over calcium hydride for 16h before being purified by vacuum distillation or toluene recrystallization to obtain pure products.

2,2,5-trimethyl-1,3-dioxolan-4-one ( $\text{Me}_3\text{DOX}$ ): Colourless oil, 60% yield.  $^1\text{H}$  NMR (500 MHz, Chloroform-*d*)  $\delta$  4.43 (q,  $J = 6.8$  Hz, 1H,  $\text{CHCH}_3$ ), 1.56 (s, 3H,  $\text{OOCCH}_3$ ), 1.49 (s, 3H,  $\text{OOCCH}_3$ ), 1.42 (d,  $J = 6.8$  Hz, 3H,  $\text{CHCH}_3$ ).  $^{13}\text{C}$  NMR (126 MHz,  $\text{CDCl}_3$ )  $\delta$  173.78, 110.36, 110.29, 110.06, 70.40, 27.41, 25.56, 17.36.

2,2-Dimethyl-5-phenyl-1,3-dioxolan-4-one ( $\text{Me}_2\text{PhDOX}$ ): White crystalline solid, 95% yield.  $^1\text{H}$  NMR (500 MHz, Chloroform-*d*)  $\delta$  7.52 – 7.46 (m, 2H, Ar), 7.48 – 7.36 (m, 4H, Ar), 5.42 (s, 1H,  $\text{OOCCH}$ ), 1.75 (s, 3H,  $\text{OOCCH}_3$ ), 1.70 (s, 3H,  $\text{OOCCH}_3$ ).  $^{13}\text{C}$  NMR (126 MHz,  $\text{CDCl}_3$ )  $\delta$  171.42, 134.45, 128.95, 128.73, 126.42, 110.94, 75.89, 27.26, 26.19.

## Representative Polymerizations

$\text{MeAl}[\text{salen}]^{\text{iBu}^t\text{Bu-Pr}}$  (5.5 mg, 0.01 mmol),  $\text{BnOH}$  (1  $\mu\text{L}$ , 0.01 mmol) and  $\text{MeDOX}$  (88 mg, 1.0 mmol) in toluene (1 mL) was added to an oven dried ampoule. The ampoule was then sealed and heated to 120  $^\circ\text{C}$  for 24 h. The reaction was then quenched by addition of two drops of  $\text{MeOH}$  and samples were taken for crude  $^1\text{H}$  NMR. The remainder was added dropwise to cold methanol and upon cooling to  $-35$   $^\circ\text{C}$  for two days a white solid was precipitated. The white solid was filtered, dried to constant weight and used for GPC analysis.

## Toxicity of Phosgene Gases and Paraformaldehyde

Paraformaldehyde: LCt50 = 810 ppm/4h (dust, rat) (Sigma Aldrich MSDS)

Diphosgene: LCt50 = 1.25ppm/4h (human) (by Haber's law)<sup>4</sup>

LCt50 = 1.7 ppm/4h (rat)<sup>5</sup>

### Monomer pricing (1 kg)

PhDOX: 90% yield

Ph(OCA): 75% yield

PhDOX (90% yield):

Ph(OCA) (75% yield):

$$\frac{1000 (g)}{164.16(gmol^{-1})} = 6.092 (mol)$$

$$\frac{1000 (g)}{178.14(gmol^{-1})} = 5.614 (mol)$$

Mandelic acid:

Mandelic acid:

$$6.092 (mol) \div 0.9 = 6.769 (mol)$$

$$5.614 (mol) \div 0.75 = 7.485 (mol)$$

$$6.769 (mol) \times 152.15 (gmol^{-1}) = 1.029 (kg)$$

$$7.485 (mol) \times 152.15 (gmol^{-1}) = 1.139 (kg)$$

$$1.029 (kg) \times 128.38 (\$kg^{-1}) = 132.10 (\$)$$

$$1.139 (kg) \times 128.38 (\$kg^{-1}) = 146.20 (\$)$$

<https://us.vwr.com/store/>

Diphosgene (Trichloromethyl

Paraformaldehyde:

chloroformate):

$$6.769 (mol) \times \frac{12 (mol)}{7.53 (mol)} = 10.79 (mol)$$

$$7.485 (mol) \times 197.82 (gmol^{-1}) = 1.481 (kg)$$

$$10.79 (mol) \times 30.03 (gmol^{-1}) = 0.324 (kg)$$

$$1.481 (kg) \times 478.80 (\$0.25kg^{-1}) = 2836.41 (\$)$$

$$0.324 (kg) \times 50.54 (\$kg^{-1}) = 16.38 (\$)$$

Paratoluensulfonic acid monohydrate:

**1 kg Ph(OCA) = \$2982.61**

$$0.677 (mol) \times 190.22 (gmol^{-1}) = 0.1288 (kg)$$

$$0.1288 (kg) \times 61.42 (\$kg^{-1}) = 7.91 (\$)$$

All chemical pricings obtained from  
<https://us.vwr.com/store/>

**1 kg PhDOX = \$ 156.39**

### Degradation of poly(mandelic acid) with proteinase K

Poly(mandelic acid) (PMA) (0.5g) was dissolved in 5 mL of  $CHCl_3$  and placed in a PTFE evaporation dish. The solvent was slowly evaporated to form a 1 mm thick plastic film. 25.92 mg of PMA film was incubated for 24 hours at 37 °C in a 1 mL buffer solution ( $H_2O$ , 30 mM TrisHCl (pH 8), 10 mM  $CaCl_2$ ) containing proteinase K (10 mg, from tritirachium album). The PMA film was rinsed with deionized water three times and dried to a constant weight of 23.21 mg (12% weight loss).

## Recycling Recovered Paraformaldehyde

After a polymerization of MeDOX, paraformaldehyde was recovered from the walls of an ampoule and subsequently dried *in vacuo* to constant weight. The recovered paraformaldehyde (11.7 mg), mandelic acid (40 mg) and *p*-toluenesulfonic acid (10mg) was dissolved in 30 mL of benzene. The solution was added to a round bottom equipped with a stir bar and refluxed in a Dean-Stark apparatus for 6h. An aliquot was removed from the reaction mixture, dried *in vacuo* and dissolved in DMSO-*d*<sub>6</sub> for <sup>1</sup>H NMR spectroscopy. The rest of the reaction mixture was purified as previously described. By <sup>1</sup>H NMR analysis, 100% conversion was obtained, matching production of PhDOX from new paraformaldehyde.

## DOX copolymerization data

### NMR data

Poly(lactic-co-glycolic acid): <sup>1</sup>H NMR (601 MHz, Chloroform-*d*) δ 5.16 (q, *J* = 7.1 Hz, 1H), 4.90 – 4.57 (m, 2H), 1.58 (d, *J* = 7.1 Hz, 3H). <sup>13</sup>C NMR (126 MHz, CDCl<sub>3</sub>) δ 169.58, 166.49, 69.01, 60.79, 16.64.

Poly(3-hydroxybutyrate-co-glycolic acid): <sup>1</sup>H NMR (500 MHz, Chloroform-*d*) δ 5.47 – 5.26 (m, 2H), 4.83 – 4.49 (m, 2H), 2.82 – 2.47 (m, 1H), 1.41 – 1.18 (m, 3H). <sup>13</sup>C NMR (126 MHz, CDCl<sub>3</sub>) δ 13C NMR (126 MHz, Chloroform-*d*) δ 169.30, 169.22, 167.14, 166.91, 166.47, 128.78, 128.72, 128.50, 68.88, 68.66, 61.35, 61.00, 60.96, 60.94, 60.84, 60.59, 40.54, 40.26, 19.94, 19.92, 19.86, 19.82.

Poly(caprolactone-co-glycolic acid): <sup>1</sup>H NMR (500 MHz, Chloroform-*d*) δ 4.82 – 4.54 (m, 2H), 4.20– 4.00 (m, 2H), 2.44– 2.24 (m, 2H), 1.73 – 1.58 (m, 4H), 1.47 – 1.30 (m, 2H). <sup>13</sup>C NMR (126 MHz, CDCl<sub>3</sub>) δ 173.42, 172.74, 172.69, 172.57, 167.85, 167.33, 167.08, 65.32, 65.12, 65.08, 64.09, 61.05, 60.55, 60.19, 34.03, 33.59, 33.54, 33.52, 28.28, 28.18, 28.15, 28.13, 28.10, 25.39, 25.35, 25.22, 25.19, 24.47, 24.40, 24.34, 24.29.

Table S01. ε-Caprolactone and DOX copolymerizations.

| M1:M2 | Time (h) | <sup>a</sup> M1 (%) | conv | <sup>a</sup> M2 (%) | conv | <sup>b</sup> M <sub>n,th</sub> (Da) | <sup>c</sup> M <sub>n</sub> (Da) | <sup>c</sup> M <sub>w</sub> (Da) | <sup>d</sup> Đ | M <sub>n</sub> , nmr |
|-------|----------|---------------------|------|---------------------|------|-------------------------------------|----------------------------------|----------------------------------|----------------|----------------------|
| 90:10 | 3        | 90                  |      | 100                 |      | 9920                                | 7000                             | 9600                             | 1.4            | /                    |
| 80:20 | 7        | 100                 |      | 100                 |      | 10390                               | 6800                             | 9600                             | 1.4            | 9770                 |
| 70:30 | 7        | 73                  |      | 100                 |      | 7670                                | 5400                             | 6800                             | 1.3            | 5430                 |
| 60:40 | 7        | 79                  |      | 97                  |      | 7760                                | 2900                             | 3700                             | 1.3            | 7120                 |
| 50:50 | 7        | 78                  |      | 97                  |      | 7370                                | 2700                             | 3400                             | 1.3            | 5730                 |

|       |    |    |    |      |      |      |     |      |
|-------|----|----|----|------|------|------|-----|------|
| 40:60 | 7  | 46 | 88 | 5270 | 1700 | 2500 | 1.5 | 2400 |
| 40:60 | 17 | 83 | 94 | 7160 | 2800 | 4800 | 1.7 | 5730 |
| 30:70 | 17 | 58 | 92 | 5830 | 1300 | 2300 | 1.8 | 5380 |

*M1 = ε-caprolactone, M2 = DOX, C = MeAl(salen)<sup>tbu,tbu,pr</sup>, I = BnOH. M:C:I = 100:1:1. Monomer concentration = 1M. <sup>a</sup> monomer conversion % determined by crude sample <sup>1</sup>H NMR spectroscopy. <sup>b</sup>  $M_{n,th} = (M:BnOH) \times MW(monomer) \times (conv\ (%)) + MW(end\ group)$ . <sup>c</sup> determined by gel permeation chromatography. <sup>d</sup>  $\bar{D} = dispersity = M_w/M_n$ .*

Table S02. β-Butyrolactone and DOX copolymerizations.

| M1:M2 | Time (h) | <sup>a</sup> M1 (%) | conv | <sup>a</sup> M2 (%) | conv | <sup>b</sup> M <sub>n,th</sub> (Da) | <sup>c</sup> M <sub>n</sub> (Da) | <sup>c</sup> M <sub>w</sub> (Da) | <sup>d</sup> $\bar{D}$ | M <sub>n</sub> , nmr |
|-------|----------|---------------------|------|---------------------|------|-------------------------------------|----------------------------------|----------------------------------|------------------------|----------------------|
| 90:10 | 17 h     | 52                  |      | 100                 |      | 4710                                | 6000                             | 7000                             | 1.2                    |                      |
| 80:20 | 24 h     | 92                  |      | 99                  |      | 7590                                | 4600                             | 5700                             | 1.3                    | 7000                 |
| 70:30 | 24 h     | 90                  |      | 98                  |      | 7230                                | 3400                             | 4000                             | 1.2                    | 6700                 |
| 60:40 | 24 h     | 86                  |      | 93                  |      | 6700                                | 1500                             | 2400                             | 1.6                    | 5800                 |

*M1 = β-butyrolactone, M2 = DOX, C = MeAl(salen)<sup>tbu,tbu,pr</sup>, I = BnOH. M:C:I = 100:1:1. Monomer concentration = 1M. <sup>a</sup> monomer conversion % determined by crude sample <sup>1</sup>H NMR spectroscopy. <sup>b</sup>  $M_{n,th} = (M:BnOH) \times MW(monomer) \times (conv\ (%)) + MW(end\ group)$ . <sup>c</sup> determined by gel permeation chromatography. <sup>d</sup>  $\bar{D} = dispersity = M_w/M_n$ .*

## Substituted RDOX homopolymerizations

R = Methyl, Poly(lactic acid): <sup>1</sup>H NMR (500 MHz, Chloroform-*d*) δ 5.16 (q, *J* = 7.1 Hz, 1H), 1.58 (d, *J* = 7.2 Hz, 3H). <sup>13</sup>C NMR (126 MHz, CDCl<sub>3</sub>) δ 169.59, 77.26, 77.01, 76.75, 69.01, 16.65.

R = Phenyl, Poly(mandelic acid): <sup>1</sup>H NMR (601 MHz, Chloroform-*d*) δ 7.48 – 7.01 (m, 5H), 6.15 – 5.92 (m, 1H). <sup>13</sup>C NMR (151 MHz, CDCl<sub>3</sub>) δ 166.76, 132.33, 129.34, 128.64, 127.80, 74.75.

R = Cyclohexyl, Poly(hexahydromandelic acid): <sup>1</sup>H NMR (500 MHz, Chloroform-*d*) δ 5.05 – 4.87 (m, 1H), 2.32 – 0.68 (m, 11H). <sup>13</sup>C NMR (126 MHz, CDCl<sub>3</sub>) δ 168.70, 39.51, 28.69, 27.18, 25.89.

R = iPropyl, Poly(vandelic acid): <sup>1</sup>H NMR (500 MHz, Chloroform-*d*) δ: 4.9 (m, 55.7H), 4.1 (d, 2H), 2.3 (b, 59.2H) 1.39 (s, 9H), 1.1 (m, 350.6H). (CDCl<sub>3</sub>, 125 MHz) δ: 168.6, 125, 128,

R = nButyl, Poly(2-nButylhexanoic acid): <sup>1</sup>H NMR (601 MHz, Chloroform-*d*) δ 5.21 – 5.03 (m, 1H), 2.03 – 1.85 (m, 2H), 1.45 – 1.30 (m, 5H), 0.98 – 0.82 (m, 7H). <sup>13</sup>C NMR (126 MHz, CDCl<sub>3</sub>) δ 169.17, 72.49, 33.66, 27.03, 22.36, 13.78.

R = iButyl, Poly(2-iButylhexanoic acid): <sup>1</sup>H NMR (601 MHz, Chloroform-*d*) δ 5.09 (dd, *J* = 9.4, 4.2 Hz, 1H), 1.85 – 1.73 (m, 4H), 0.94 (dd, *J* = 20.2, 6.4 Hz, 6H). <sup>13</sup>C NMR (126 MHz, CDCl<sub>3</sub>) δ 169.70, 71.34, 39.31, 24.50, 22.96, 21.41.

Table S03. MeDOX Polymerizations

| Catalyst             | Solvent | Conc (M) | Temp (°C) | Time (h) | <sup>a</sup> Conv (%) | <sup>b</sup> M <sub>n,th</sub> (Da) | <sup>c</sup> M <sub>n</sub> (Da) | <sup>c</sup> M <sub>w</sub> (Da) | <sup>d</sup> Đ |
|----------------------|---------|----------|-----------|----------|-----------------------|-------------------------------------|----------------------------------|----------------------------------|----------------|
| MeAl(salen)          | Tol     | 1        | 85        | 72       | 86                    | 6,300                               | 290                              | 430                              | 1.46           |
| MeAl(salen)          | Tol     | 1        | 110       | 24       | 81                    | 5,940                               | 8,290                            | 9,630                            | 1.16           |
| Sn(Oct) <sub>2</sub> | Tol     | 1        | 110       | 24       | 28                    | 2,124                               | /                                | /                                | /              |
| Sn(Oct) <sub>2</sub> | Bulk    | Bulk     | 120       | 1.5      | 59                    | 4,356                               | 2,300                            | 3,980                            | 1.73           |
| ZnEt <sub>2</sub>    | THF     | 1        | 75        | 48       | 88                    | 6,444                               | 4,320                            | 6,270                            | 1.45           |
| ZnEt <sub>2</sub>    | THF     | 1        | 75        | 192      | 99                    | 7,306                               | 3,862                            | 5,548                            | 1.44           |

*I* = BnOH. *M*:*C*:*I* = 100:1:1. Solution polymerizations completed in toluene. <sup>a</sup> monomer conversion % determined by crude sample <sup>1</sup>H NMR spectroscopy. <sup>b</sup> M<sub>n,th</sub> = (*M*:BnOH) × MW(monomer) × (conv (%)) + MW(end group). <sup>c</sup> Determined by gel permeation chromatography. <sup>d</sup> Đ = dispersity = M<sub>w</sub>/M<sub>n</sub>.

Table S04. PhDOX Polymerizations

| M         | M:C:I   | Catalyst                 | Time (h) | <sup>a</sup> Conv (%) | <sup>b</sup> M <sub>n,th</sub> (Da) | <sup>c</sup> M <sub>n</sub> (Da) | <sup>c</sup> M <sub>w</sub> (Da) | <sup>d</sup> Đ | <sup>e</sup> Tacticity |
|-----------|---------|--------------------------|----------|-----------------------|-------------------------------------|----------------------------------|----------------------------------|----------------|------------------------|
| rac-PhDOX | 100:1:1 | Sn(Oct) <sub>2</sub>     | 19       | 38                    | 5210                                | 800                              | 1100                             | 1.4            | atactic                |
| S-PhDOX   | 50:1:1  | ZnEt <sub>2</sub>        | 4        | 27                    | 3700                                | 2000                             | 2300                             | 1.2            | atactic                |
| S-PhDOX   | 50:1:1  | Sn(Oct) <sub>2</sub>     | 4        | 65                    | 4470                                | 3400                             | 7400                             | 2.2            | isotactic              |
| Rac-PhDOX | 100:1:1 | MeAl(salen) <sup>f</sup> | 72       | 92                    | 12450                               | 4000                             | 5600                             | 1.2            | atactic                |
| R-PhDOX   | 100:1:1 | MeAl(salen) <sup>f</sup> | 72       | 98                    | 13250                               | 4800                             | 6300                             | 1.3            | isotactic              |
| S-PhDOX   | 100:1:1 | MeAl(salen) <sup>f</sup> | 72       | 96                    | 12990                               | 4900                             | 6000                             | 1.2            | isotactic              |
| S-PhDOX   | 50:1:1  | MeAl(salen) <sup>f</sup> | 4        | 89                    | 6080                                | 3700                             | 4800                             | 1.3            | isotactic              |
| S-PhDOX   | 50:1:1  | MeAl(salen) <sup>g</sup> | 4        | 59                    | 4070                                | 3900                             | 4100                             | 1.1            | atactic                |
| S-PhDOX   | 50:1:1  | MeAl(salan)              | 4        | 43                    | 2990                                | 1000                             | 3800                             | 3.7            | isotactic              |
| S-PhDOX   | 200:1:1 | MeAl(salen) <sup>f</sup> | 120      | 83                    | 22370                               | 8400                             | 9600                             | 1.1            | isotactic              |
| R-PhDOX   | 200:1:1 | MeAl(salen) <sup>g</sup> | 120      | 96                    | 25860                               | 7700                             | 11300                            | 1.5            | isotactic              |

Monomer concentration = 1M. *I* = Benzyl alcohol. <sup>a</sup> monomer conversion % determined by crude sample <sup>1</sup>H NMR spectroscopy. <sup>b</sup> M<sub>n,th</sub> = (*M*:BnOH) × MW(monomer) × (conv (%)) + MW(end group). <sup>c</sup> determined by gel permeation chromatography. <sup>d</sup> Đ = dispersity = M<sub>w</sub>/M<sub>n</sub>. <sup>e</sup> Determined from methine peak in <sup>1</sup>H NMR spectrum. <sup>f</sup> Salen ligand substituted with tBu at the 2,4 positions. <sup>g</sup> Salen ligand substituted with Cl at the 2,4 positions.



Table S05. Other alkyl substituted DOX polymerizations.

| Monomer | Conc (1M) | Temp. (°C) | Time (h) | <sup>a</sup> Conv (%) | M <sub>n,th</sub> (Da) | M <sub>n</sub> (Da) | M <sub>w</sub> (Da) | Đ   |
|---------|-----------|------------|----------|-----------------------|------------------------|---------------------|---------------------|-----|
| tMDOX   | 1         | 120        | 168      | 95                    | 6950                   | 4600                | 6800                | 1.5 |
| dMPHDOX | 1         | 120        | 168      | 6                     | /                      | /                   | /                   | /   |
| dMPHDOX | bulk      | 180        | 20       | 91                    | 13000                  | 12800               | 15800               | 1.2 |
| nBuDOX  | 1         | 120        | 72       | 97                    | 11160                  | 1800                | 2500                | 1.4 |
| iBuDOX  | 1         | 120        | 72       | 99                    | 11390                  | 7500                | 8900                | 1.1 |
| CyDOX   | 1         | 120        | 72       | 65                    | 9200                   | 1500                | 1800                | 1.3 |
| iPrDOX  | 1         | 120        | 20       | 33                    | 3400                   | 3800                | 5600                | 1.5 |

Monomer:MeAl(salen):BnOH = 100:1:1. Solution polymerizations were completed in toluene. <sup>a</sup>monomer conversion %determined by crude sample <sup>1</sup>H NMR spectroscopy. <sup>b</sup>M<sub>n,th</sub> = ([M]/[BnOH]) × MW(monomer) × (% conv.) + MW(end group). <sup>c</sup>determined by gel permeation chromatography. Đ=dispersity=M<sub>w</sub>/M<sub>n</sub>.

Table S06 Glass Transition Temperatures.

Below is a list of the various PAHAs synthesised and their relevant glass transition temperatures.

| R      | Glass Transition Temperature T <sub>g</sub> ( °C) |
|--------|---------------------------------------------------|
| R-Me   | 59                                                |
| rac-Ph | 100                                               |
| R-Ph   | 115                                               |
| iPr    | 41                                                |
| Cy     | 98                                                |
| iBu    | 22                                                |

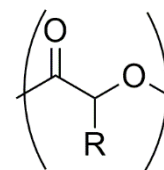

For original measurement and report of these glass transition temperatures see:

G. L. Baker, E. B. Vogel and M. R. S. III, *Polym. Rev.*, 2008; M. Yin, G. L. Baker, *Macromolecules*, 1999, **32**, 7711; F. Jing, M. R. Smith, G. L. Baker, *Macromolecules*, 2007, **40**, 9304.

## Figures

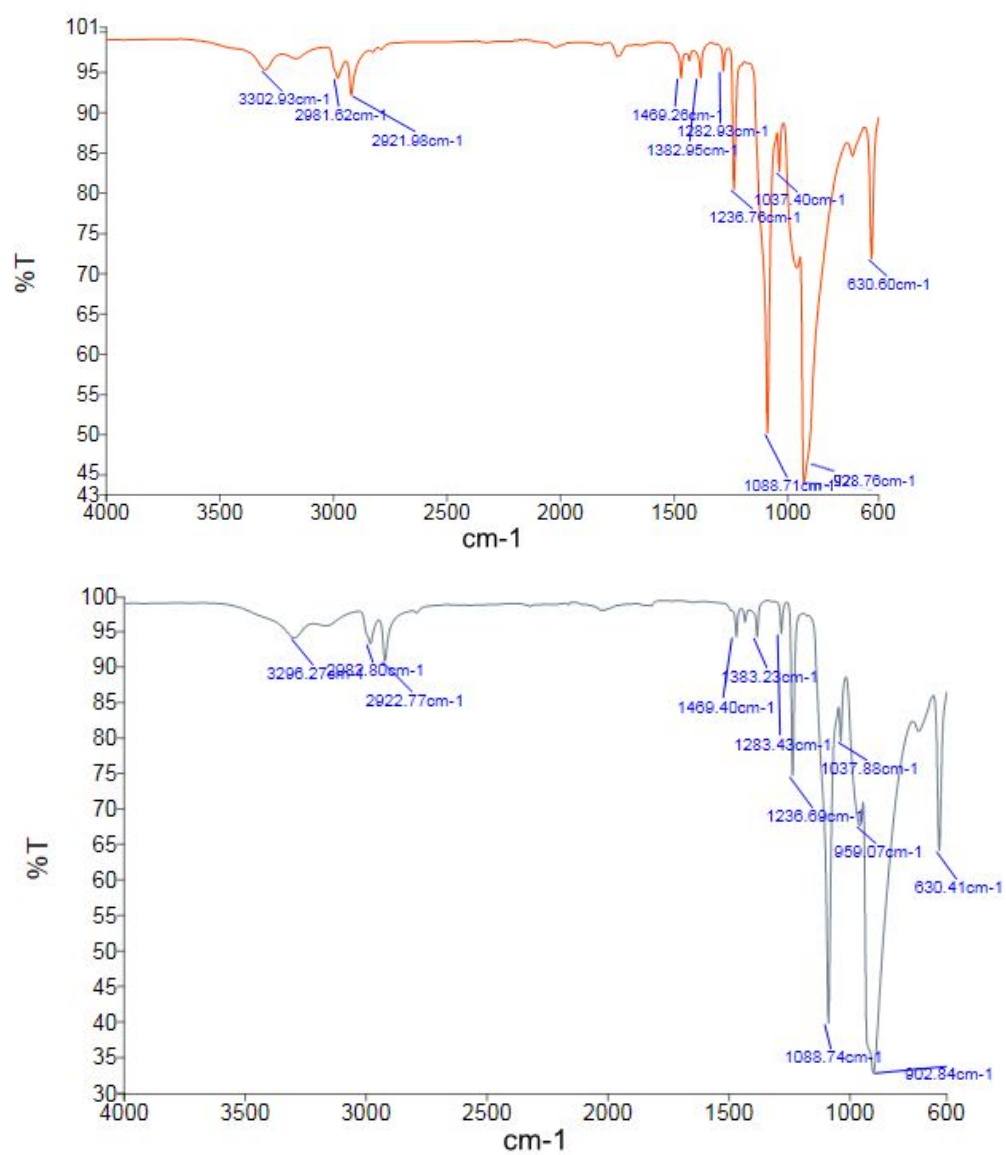

Figure S1. IR spectrum of white solid sublimed from reaction (above) and comparative paraformaldehyde spectrum (below).

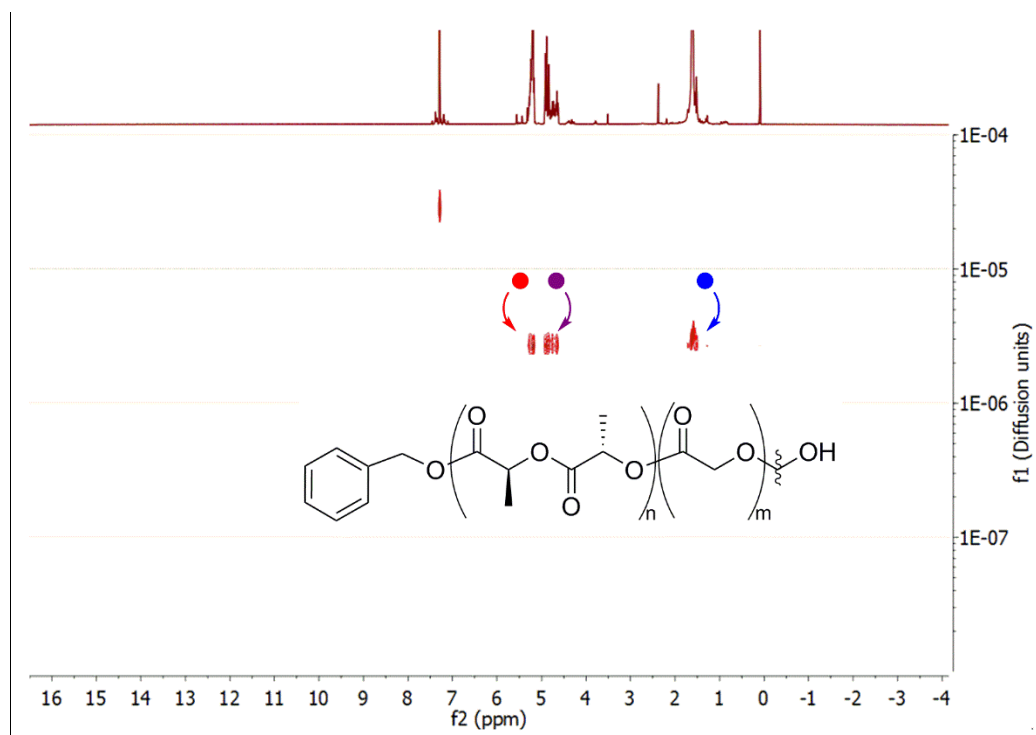

Figure S2 DOSY NMR spectrum of PLA-PGA copolymer in  $\text{CDCl}_3$

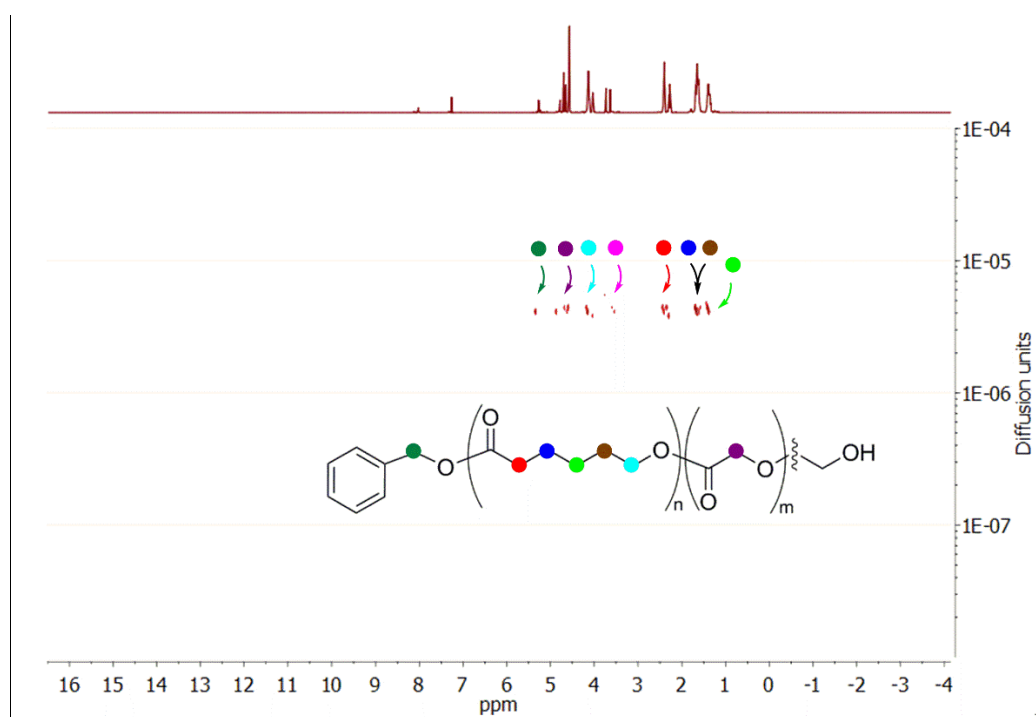

Figure S3 DOSY NMR spectrum of crude PCL-PGA copolymer in  $\text{CDCl}_3$

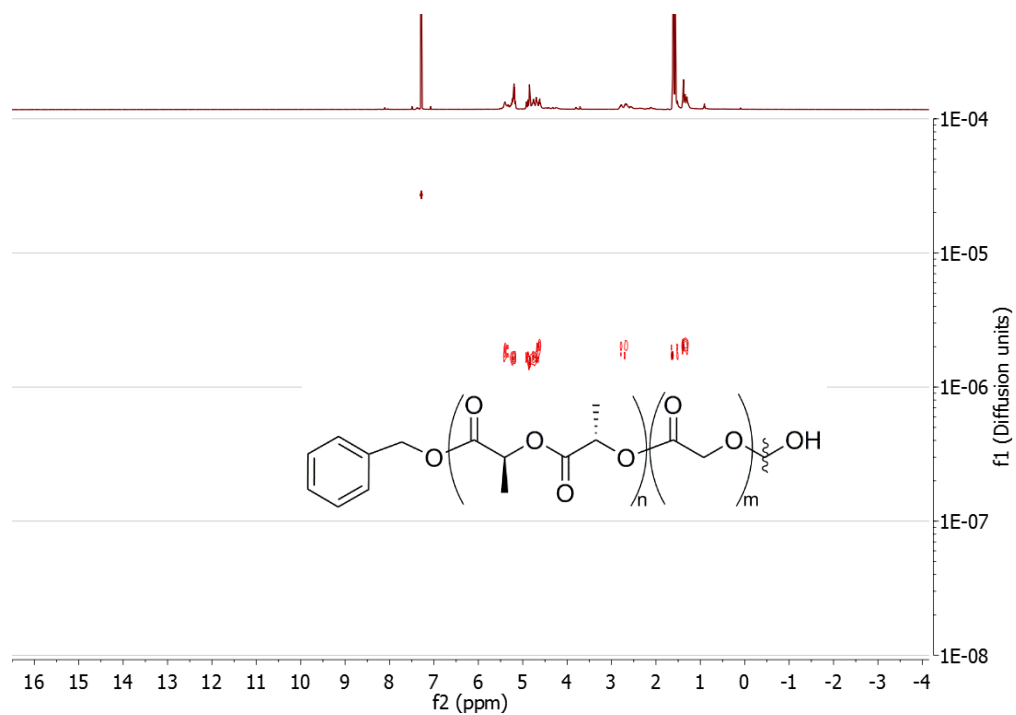

Figure S4 DOSY NMR spectrum of crude PLA-PGA copolymer in  $\text{CDCl}_3$

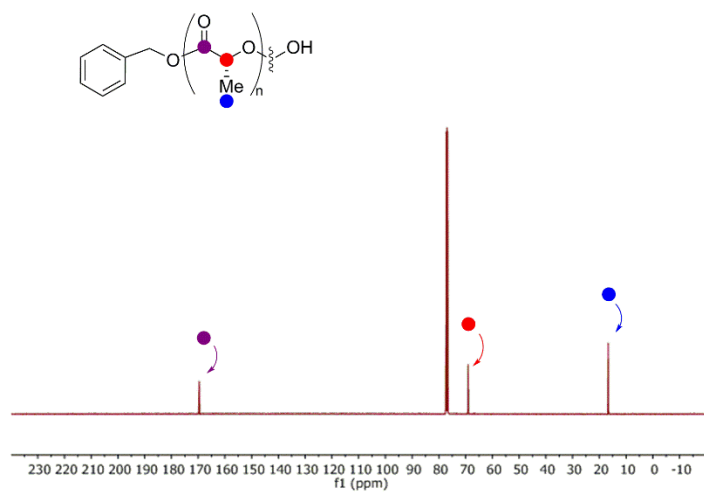

Figure S5 PLA  $^{13}\text{C}\{^1\text{H}\}$  NMR spectrum ( $\text{CDCl}_3$ )

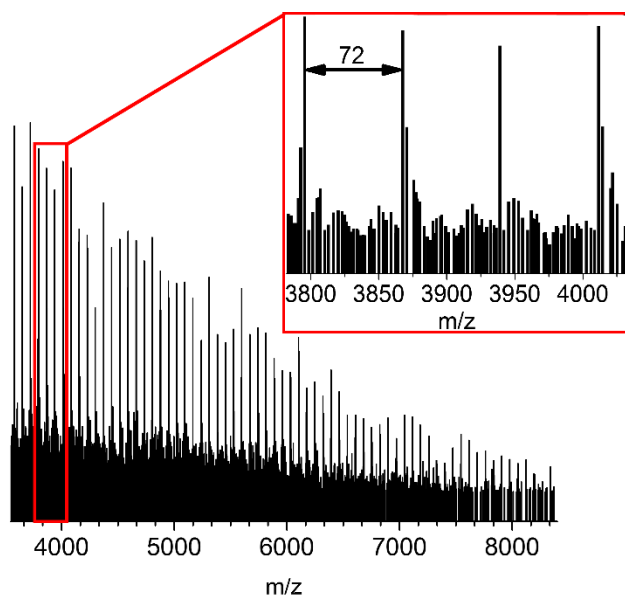

Figure S6. MALDI-ToF spectrum of PLA from the polymerization of MeDOX.

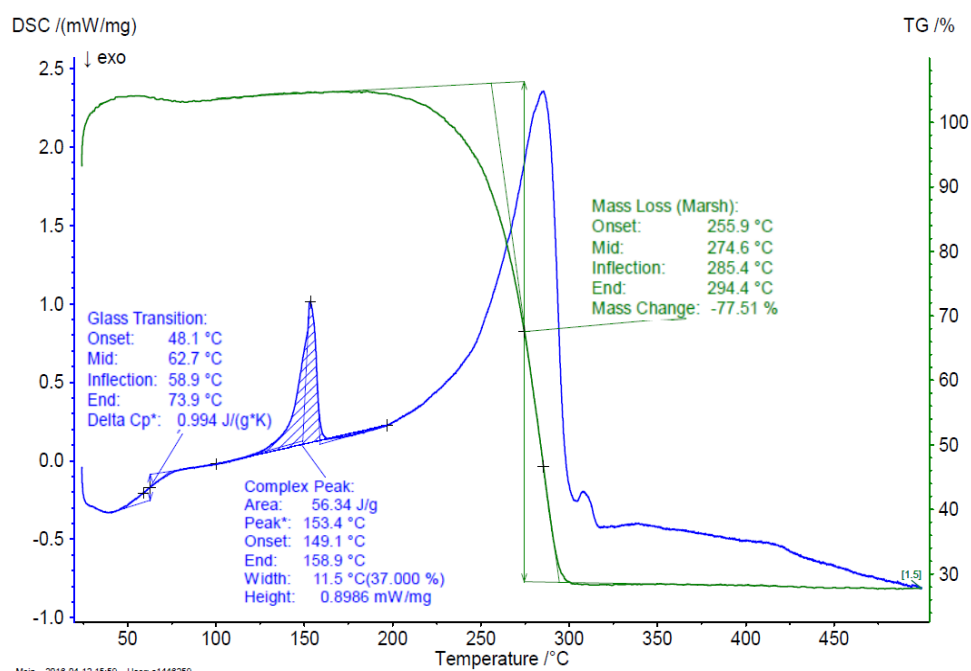

Figure S7. DSC(blue) and TGA(green) of PLA from MeDOX

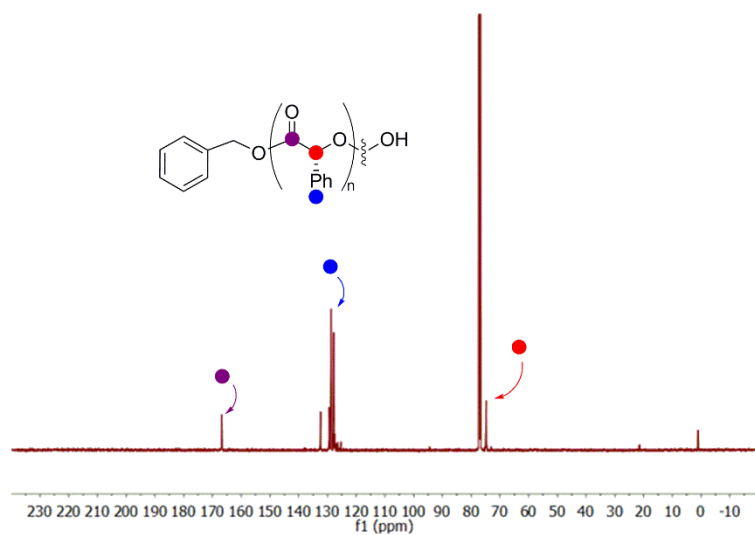

Figure S8  $^{13}\text{C}\{^1\text{H}\}$  NMR spectrum ( $\text{CDCl}_3$ ) of PMA

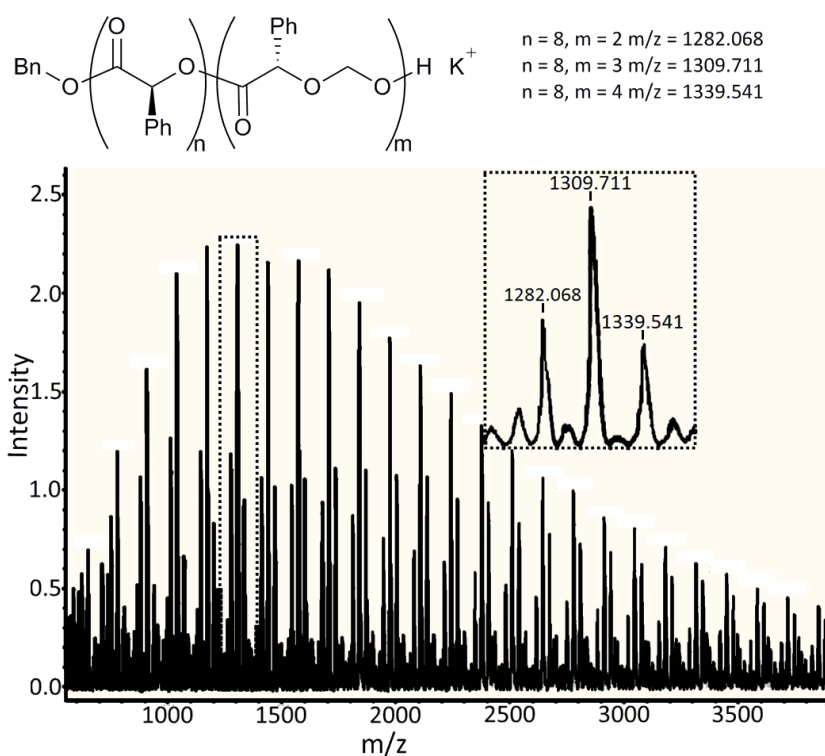

Figure S9 MALDI-ToF spectrum of poly(mandelic acid), showing the mandelic acid repeat unit (peak difference of  $m/z = 134$ ) and three series correlating with retained acetal linkages, each initiated by a benzyl alcohol unit. This sample is representative of short polymer chains suitable for MALDI analysis and thus may not be representative of polymer samples at higher conversions and longer chains.

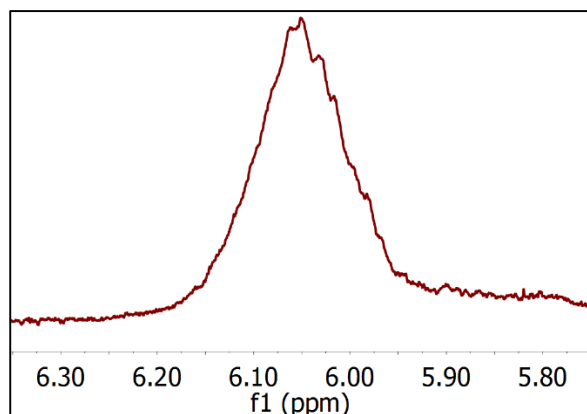

Figure S10. <sup>1</sup>H NMR spectrum of methine region of atactic PMA

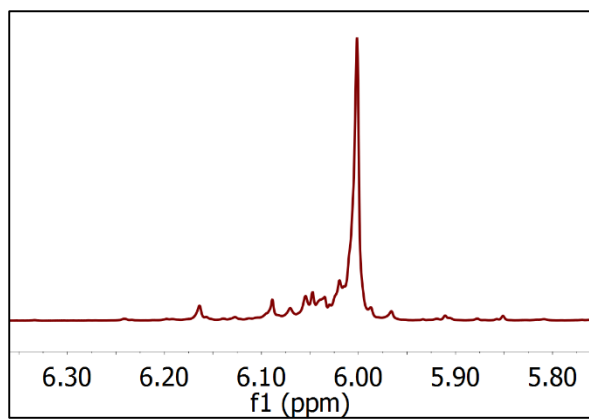

Figure S11. <sup>1</sup>H NMR spectrum of methine region of isotactic PMA

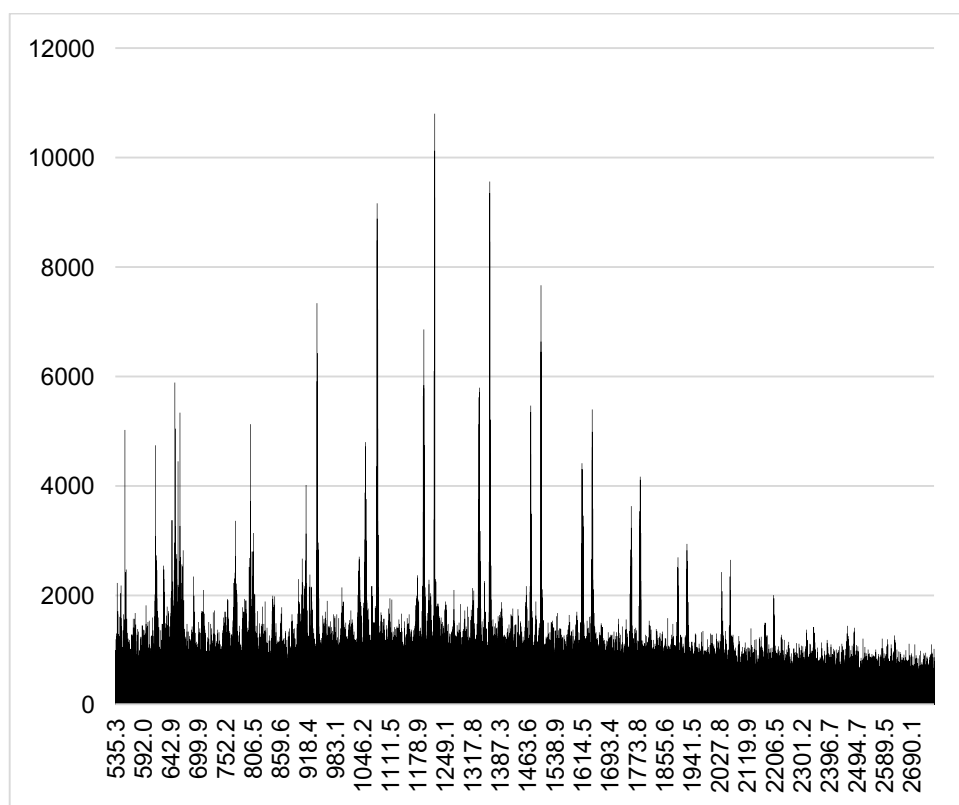

Figure S12. MALDI-ToF spectrum of low molecular weight poly(hexahydromandelic acid) (PHHMA)



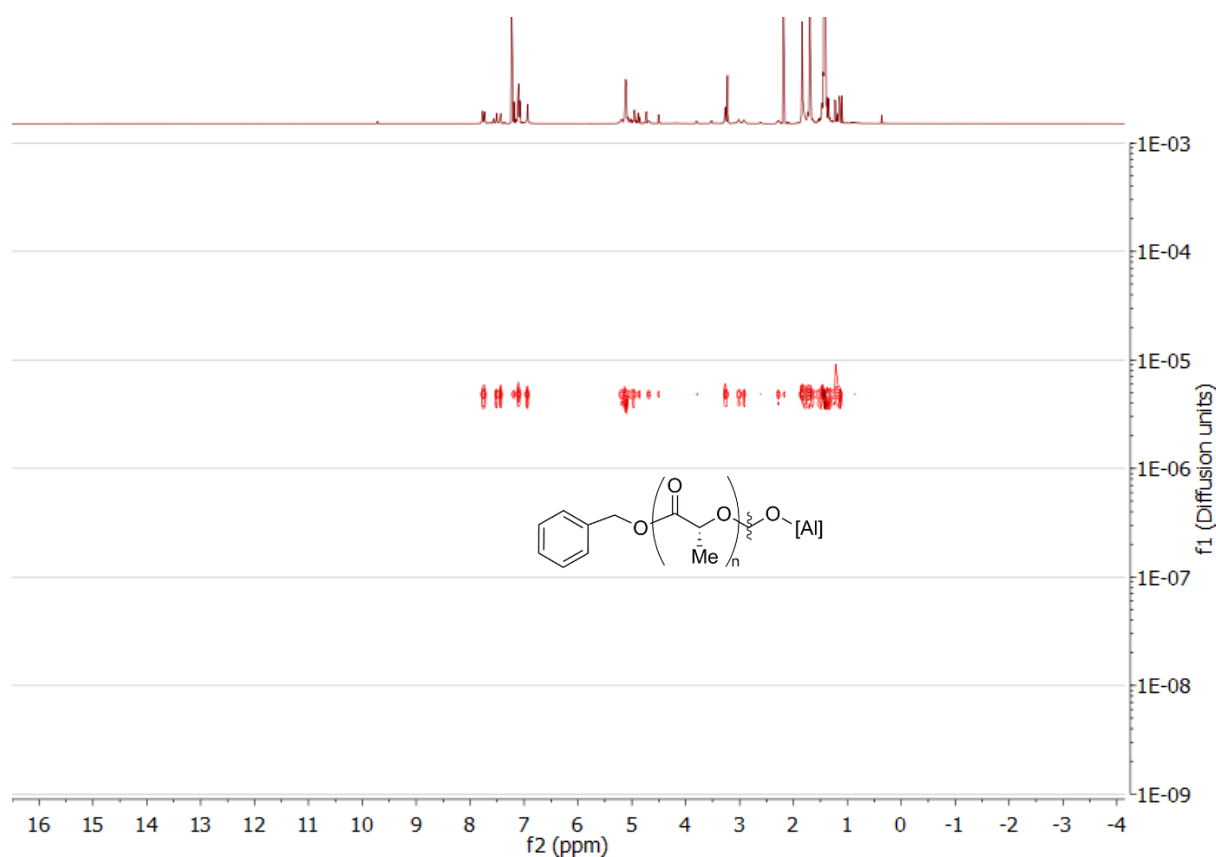

Figure S13. DOSY NMR spectrum of active polymer chain using monomer:catalyst:initiator ratio of 20:1:1 in toluene (110 °C, 2h).

## References

- (1) Fiore, G. L.; Klinkenberg, J. L.; Fraser, C. L. Iron Tris(bipyridine)-Centered Poly(ethylene Glycol)-Poly(lactic Acid) Star Block Copolymers. *Macromolecules* **2008**, *41* (23), 9397–9405.
- (2) Hori, Y.; Hagiwara, T. Ring-Opening Polymerisation of  $\beta$ -Butyrolactone Catalysed by Distannoxane Complexes: Study of the Mechanism. *Int. J. Biol. Macromol.* **1999**, *25* (1-3), 237–245.
- (3) Zhou, X.; Hong, L. Controlled Ring-Opening Polymerization of Cyclic Esters with Phosphoric Acid as Catalysts. *Colloid Polym. Sci.* **2013**, *291* (9), 2155–2162.
- (4) Hoenig, S. L. Compendium of Chemical Warfare Agents.
- (5) Pauluhn, J. Acute Nose-Only Inhalation Exposure of Rats to Di- and Triphosgene Relative to Phosgene. *Inhal. Toxicol.* **2011**, *23* (2), 65–73.
